# Supplementary material for: Prognostic Significance of the Myelodysplastic Syndrome-Specific Comorbidity Index (MDS-CI) in Patients with Myelofibrosis: A Retrospective Study
Source: MDPI journal article supplement (doi:10.3390/cancers15194698), 2023-09-24
Supplement: s1 [file s1]

## **Supplementary materials**

### **Supplementary methods**

DNA was isolated from bone marrow aspirate or biopsy samples by automated DNA purification on a Maxwell® RSC instrument (Promega, Fitchburg, WI, USA). DNA concentration was measured with the Qubit™ dsDNA BR (Broad Range) Assay Kit (Thermo Fisher Scientific, San Francisco, CA, USA). For NGS-based mutation analysis, the DNA panel of the Oncomine™ Myeloid Research Assay (OMRA; Thermo Fisher Scientific,) was used that targets all exonic regions of 17 genes and exonic hotspots of 23 genes (526 amplicons). OMRA libraries were prepared manually according to the manufacturer's instructions (Thermo Fisher Scientific). Briefly, barcoded libraries were generated from 30 ng of sample genomic DNA. Targets were amplified using multiplex PCR. Amplification products were partially digested with Fupa enzyme, followed by ligation of unique barcode adapters for each library. The barcoded libraries were quantified by qPCR using the KAPA Library Quantification Kit (Roche) and diluted to 40 pmol/L. Templating and clonal amplification of sample libraries onto Ion Sphere Particles by emulsion PCR were performed with the Ion Chef™ instrument (Thermo Fisher Scientific). Enriched Ion Sphere Particles were loaded onto 510, 520, or 530 chips using an Ion 510™ & Ion 520™, or Ion 530™ Kit. A total of 3, 4 and 20 samples per 510, 520 and 530 chip, respectively, were run in the automated templating preparation on the Ion Chef™. Sequencing was performed on an Ion GeneStudio™ S5 instrument (Thermo Fisher Scientific). The Torrent Suite software version 5.10.0 (Thermo Fisher Scientific) was used for sequence alignment to reference genome hg19 and base calling. Coverage maps were generated using the Coverage Analysis plugin version 5.16.0 (Thermo Fisher Scientific). Variant identification and annotation were performed using Ion Reporter™ (IR) software version 5.16 (Thermo Fisher Scientific) using the default analysis parameter settings of the Oncomine Myeloid Research workflow. In these settings, the minimum coverage requirement for the analysis is 20 for both SNVs and indels, and 15 for hotspots; the minimum cutoff variant allele fraction (VAF) is 2.5% for both SNVs and indels and 3% for hotspots; and the maximum strand bias tolerance is 0.9 for SNVs, 0.85 for indels, and 0.96 for hotspots.

**Supplementary Table S1.** Variables and risk groups of the MDS-CI according to [17].

| Comorbidity                        | Definition                                                                                                                                                                                                                                                                                                                                                          | Points |
|------------------------------------|---------------------------------------------------------------------------------------------------------------------------------------------------------------------------------------------------------------------------------------------------------------------------------------------------------------------------------------------------------------------|--------|
| Cardiac                            | Arrhythmia (atrial fibrillation or flutter, sick sinus syndrome or ventricular arrhythmias)<br>Heart valve disease (except mitral valve prolapse)<br>Coronary artery disease or myocardial infarction (one or more vessel-coronary artery stenosis requiring medical treatment, stent or bypass graft)<br>Congestive heart failure or ejection fraction $\leq 50\%$ | 2      |
| Moderate to severe hepatic disease | Cirrhosis<br>Fibrosis<br>Persistent bilirubin $>1.5\times$ ULN<br>AST/ALT $>1.5\times$ ULN                                                                                                                                                                                                                                                                          | 1      |
| Severe pulmonary disease           | DLCO and/or FEV1 $\leq 65\%$ or<br>Dyspnoe at rest<br>or requires oxygen                                                                                                                                                                                                                                                                                            | 1      |
| Renal disease                      | Persistent creatinine $>2\text{mg/dl}$<br>renal dialysis or renal transplant                                                                                                                                                                                                                                                                                        | 1      |
| Solid tumor                        | Malignancy at any time point in the patients history, excluding non-melanoma skin cancer                                                                                                                                                                                                                                                                            | 1      |
| <b>MDS-Comorbidity Index</b>       |                                                                                                                                                                                                                                                                                                                                                                     |        |
| MDS-CI risk                        | Sum of individual variable scores                                                                                                                                                                                                                                                                                                                                   |        |
| Low risk                           | 0                                                                                                                                                                                                                                                                                                                                                                   |        |
| Intermediate risk                  | 1-2                                                                                                                                                                                                                                                                                                                                                                 |        |
| High risk                          | $>2$                                                                                                                                                                                                                                                                                                                                                                |        |

*DLCO indicates diffusion capacity of the lung for carbon monoxide; FEV1: forced expiratory volume in one second; ULN upper limit of normal; AST: aspartate aminotransferase; ALAT: Alanine aminotransferase*

**Supplementary Table S2.** Characteristics of patients within the MDS-CI high-risk group (n = 7).

| UPN | Age at diagnosis | DIPSS | Year of diagnosis | Status   | Treatment                                   | Cause of Death                                                                                                                     | Comment                                              |
|-----|------------------|-------|-------------------|----------|---------------------------------------------|------------------------------------------------------------------------------------------------------------------------------------|------------------------------------------------------|
| 77  | 80               | high  | 2020              | deceased | Ruxolitinib                                 | Sepsis in Neutropenia                                                                                                              |                                                      |
| 33  | 78               | high  | 2012              | deceased | Hydroxyurea followed by Ruxolitinib         | Pneumonia with multi organ failure                                                                                                 |                                                      |
| 21  | 73               | Int-2 | 2020              | deceased | Best Supportive Care including transfusions | Multi organ failure during chemotherapy with carboplatin/etoposide for a metastatic NET, diagnosed simultaneously with post-PV MF. | Severe thrombocytopenia prevented use of Ruxolitinib |
| 72  | 76               | Int-2 | 2010              | deceased | Best Supportive Care including transfusions | Decompensated liver cirrhosis                                                                                                      | Ruxolitinib not yet available                        |
| 28  | 76               | Int-2 | 2019              | alive    | Hydroxurea followed by Ruxolitinib          | Not applicable                                                                                                                     |                                                      |
| 68  | 69               | Int-1 | 2021              | alive    | Ruxolitinib                                 | Not applicable                                                                                                                     |                                                      |
| 35  | 74               | Int-1 | 2017              | alive    | Ruxolitinib                                 | Not applicable                                                                                                                     |                                                      |

### Supplementary Table S3.

Characteristics of patients with primary myelofibrosis. Data are shown for the whole population and according to the presence or absence of comorbidities as defined by the MDS-CI (MDS-CI 0 versus MDS-CI  $\geq 1$ ).

|                                                  | Primary Myelofibroses   | MDS-CI 0                | MDS-CI $\geq 1$         | p            |
|--------------------------------------------------|-------------------------|-------------------------|-------------------------|--------------|
| n                                                | 51                      | 26                      | 25                      |              |
| Age [years], median, (IQR)                       | 73 (62; 78)             | 71 (59;77)              | 76 (64; 80)             | 0.124        |
| Female n, (%)                                    | 23 (45)                 | 12 (46)                 | 11 (44)                 | 0.877        |
| Bone Marrow fibrosis grade 2 n (%)               | 37 (72.5)               | 16 (61.5)               | 21 (84)                 |              |
| Bone Marrow fibrosis grade 3 (n, %)              | 14 (27.5)               | 10 (38.5)               | 4 (16)                  | 0.072        |
| Hemoglobin [g/l], median (IQR)                   | 111 (93; 124)           | 114 (99; 124)           | 107 (86; 126)           | 0.386        |
| Platelet count ( $\times 10^9/l$ ), median (IQR) | 515 (218; 762)          | 551 (197; 791)          | 434 (263; 717)          | 0.749        |
| Leukocytes ( $\times 10^9/l$ ), median (IQR)     | 9.4 (6.8; 14.4)         | 7.45 (6.65; 11.48)      | 11.9 (7.5; 21)          | <b>0.041</b> |
| Neutrophils ( $\times 10^9/l$ ), median (IQR)    | 6.5 (4.3; 12.7)         | 5.8 (3.88; 7.62)        | 9.8 (4.85; 16.45)       | 0.085        |
| Monocytes ( $\times 10^9/l$ ), median (IQR)      | 0.56 (0.36; 0.85)       | 0.55 (0.40; 0.76)       | 0.57 (0.31; 1.18)       | 0.816        |
| Lymphocytes ( $\times 10^9/l$ ), median (IQR)    | 1.60 (1.1; 2.20)        | 1.55 (1.15; 1.93)       | 1.70 (1.05; 2.30)       | 0.391        |
| Blasts PB (%), median IQR                        | 0 (0;1)                 | 0 (0;0.25)              | 0 (0, 1)                | 0.090        |
| Constitutional Symptoms (n, %)                   | 26 (51)                 | 11 (42.3)               | 15 (60)                 | 0.206        |
| LDH available [U/l] median (IQR)                 | 47/51 502 (362;645)     | 24/26 490 (364; 5932)   | 23/25 554 (326; 777)    | 0.469        |
| CRP available [mg/l], median (IQR)               | 49/51 5 (2;16)          | 24/26 3.0 (1.0; 6.5)    | 25/25 9.0 (4.5; 33.5)   | <b>0.002</b> |
| Ferritin available [ $\mu g/l$ ], Median (IQR)   | 35/51 177 (107; 300)    | 17/26 130 (59; 175)     | 18/25 277 (170; 458)    | <b>0.002</b> |
| Albumin available [g/l], median (IQR)            | 43/51 40.2 (37; 42.3)   | 23/26 42.1 (37.8; 43.6) | 20/25 38.1 (36.4; 42.1) | 0.062        |
| Need of transfusion (n, %)                       | 15 ( 29.4)              | 7 (26.9)                | 8 (32)                  | 0.691        |
| Splenomegaly (clinically or imaging)             | 42 (82.4)               | 21 (80.8)               | 21 (84)                 | 0.762        |
| BMI available [kg/m <sup>2</sup> ], median (IQR) | 47/51 24.4 (21.5; 28.2) | 22/26 23.0 (21.4; 28.1) | 25/25 26.0 (21.6; 28.6) | 0.430        |

# **Supplementary Table S4.**

Multivariate Cox regression models, including the MDS-CI and “DIPSSdich” (Multivariate 1, n=51) or “MIPSS70dich” (Multivariate 2, n=41) as categorical variables for patients with primary myelofibrosis only.

|                       | <b>Multivariate 1</b> |               |        | <b>Multivariate 2</b> |             |        |
|-----------------------|-----------------------|---------------|--------|-----------------------|-------------|--------|
|                       | HR                    | 95% CI        | p      | HR                    | 95% CI      | p      |
| <b>MDS-CI*</b>        |                       |               |        |                       |             |        |
| intermediate          | 1.80                  | 0.65; 4.96    | 0.2562 | 1.81                  | 0.829; 3.93 | 0.1370 |
| high                  | 15.41                 | 42.246; 105.8 | 0.0054 | 11.9                  | 2.42; 58.76 | 0.0023 |
| <b>DIPSSdich**</b>    | 7.39                  | 200; 27.32    | 0.0027 |                       |             |        |
| <b>MIPSS70dich***</b> |                       |               |        | 4.79                  | 1.56; 14.75 | 0.0063 |

\*Reference low risk; \*\*Reference low/intermediate-1 risk; \*\*\*Reference low/intermediate risk

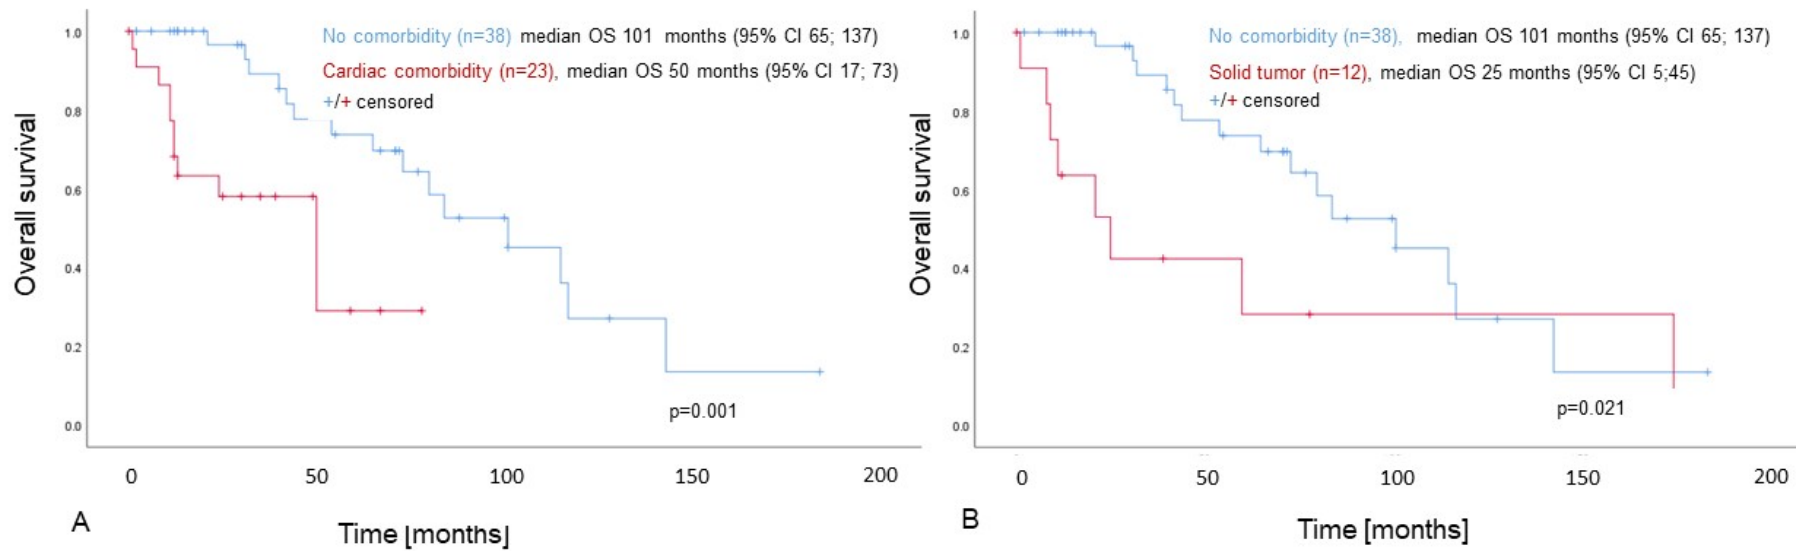

**Supplementary Figure S1.** Survival of MF patients with a cardiac comorbidity (A) or a solid tumor (B) compared to MF patients without any comorbidities according to MDS-CI.

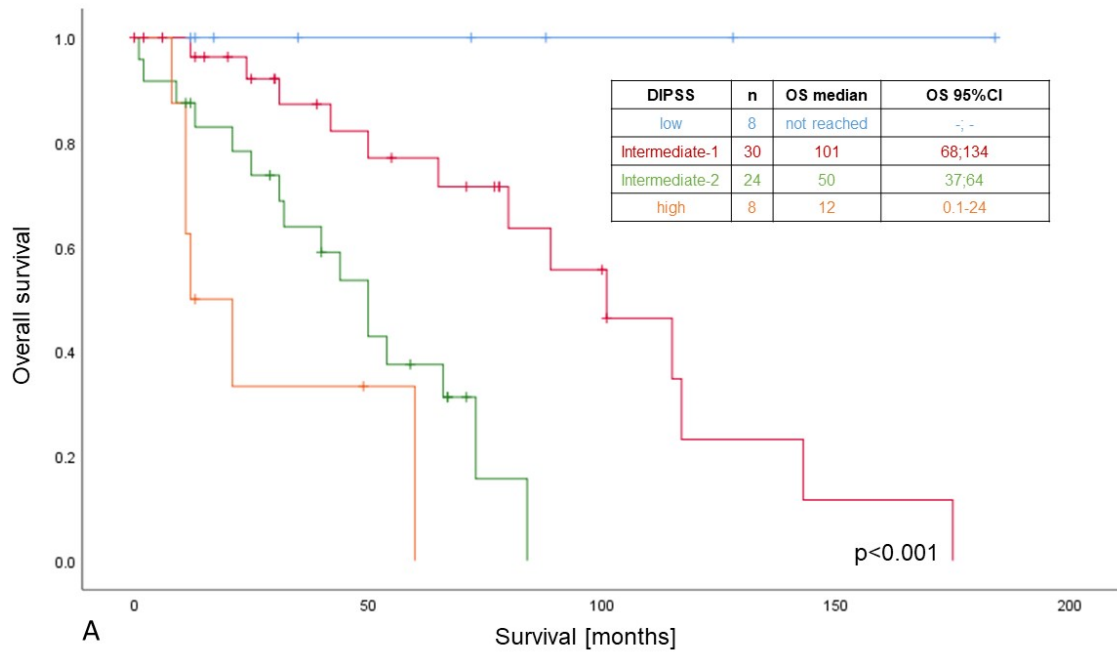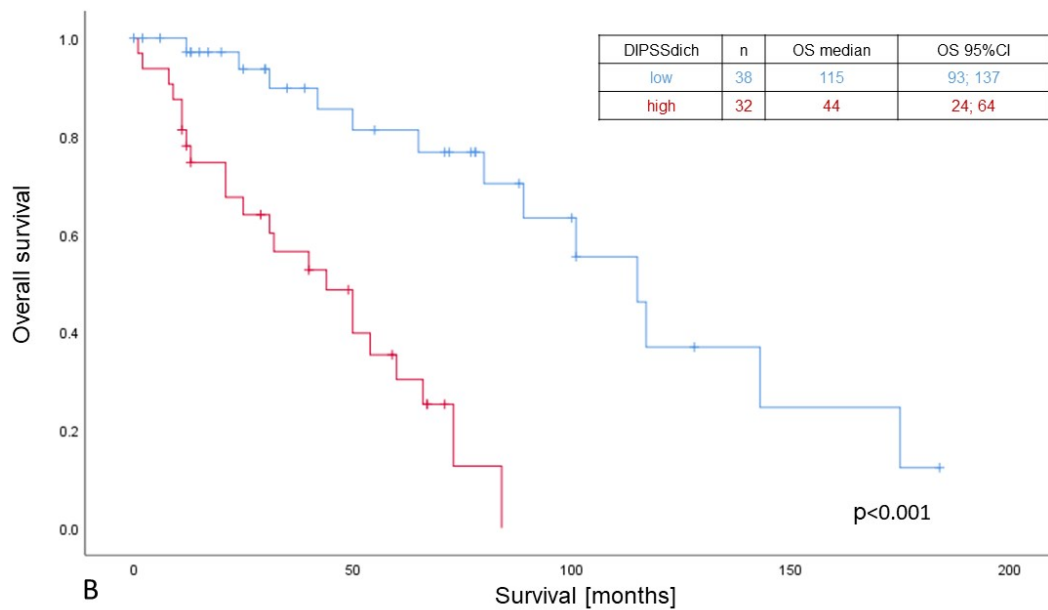

**Supplementary Figure S2.** Survival according to DIPSS (A) and DIPSSdich (B), with DIPSSdich low comprising low and intermediate-1 and DIPSSdich high comprising intermediate-2 and high risk patients according to DIPSS.

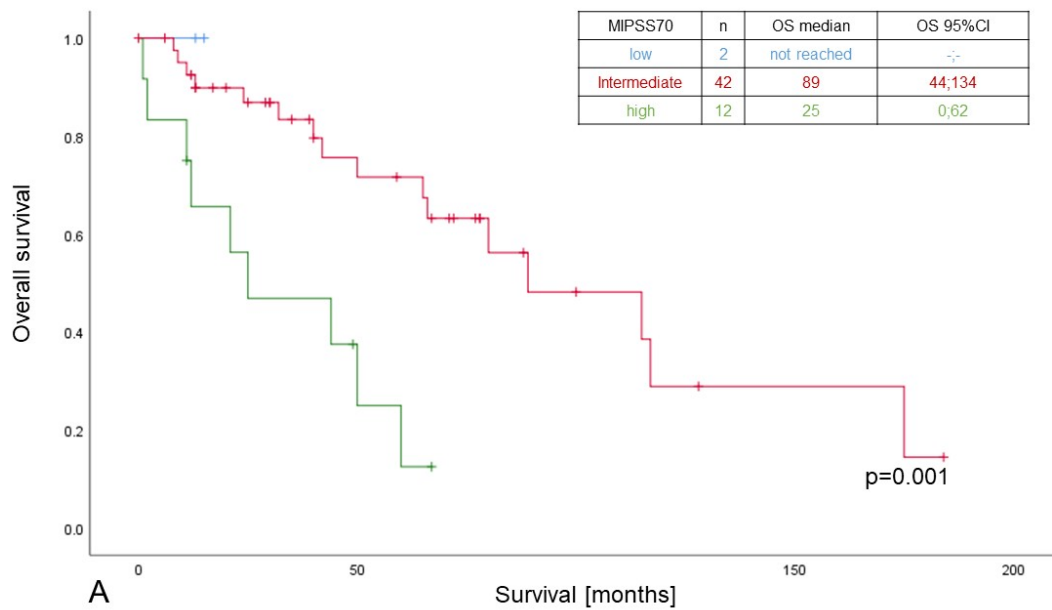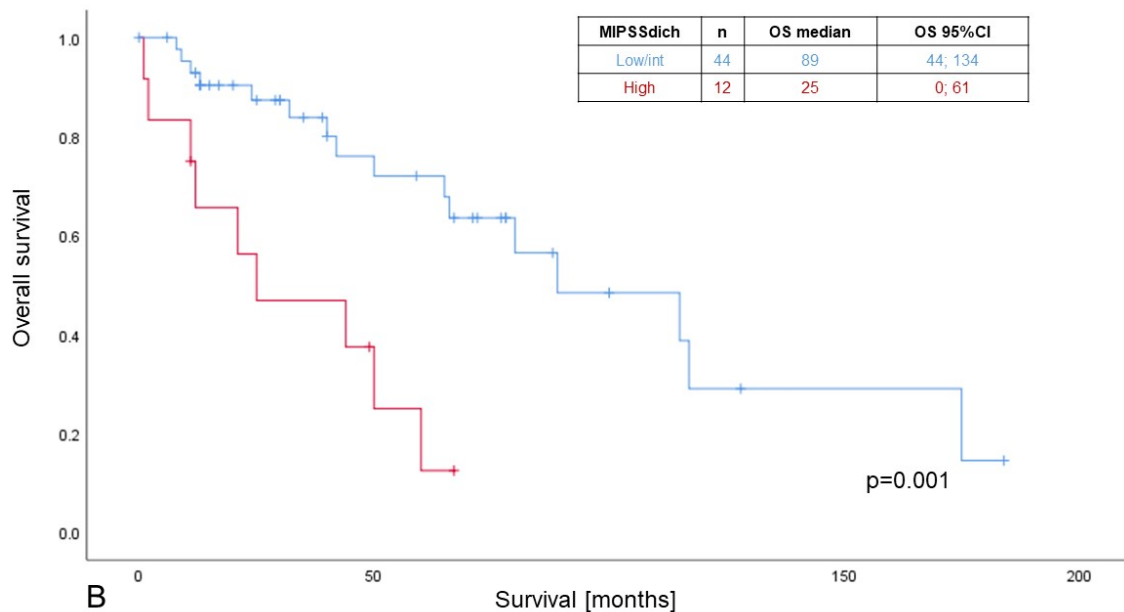

**Supplementary Figure S3.** Survival of the MF cohort according to MIPSS70 (A) and MIPSS70dich (B), with MIPSS70dich<sup>low/int</sup> comprising low and intermediate-risk patients and MIPSS70dich<sup>high</sup> comprising high-risk patients according to MIPSS70.

## Reference

17 Della Porta, M.G.; Malcovati, L.; Strupp, C.; Ambaglio, I.; Kuendgen, A.; Zipperer, E.; Travaglino, E.; Invernizzi, R.; Pascutto, C.; Lazzarino, M.; et al. Risk Stratification Based on Both Disease Status and Extra-Hematologic Comorbidities in Patients with Myelodysplastic Syndrome. *Haematologica* **2011**, *96*, 441–449. <https://doi.org/10.3324/haematol.2010.033506>.
